# Supplementary material for: The Impact of C-3 Side Chain Modifications on Kynurenic Acid: A Behavioral Analysis of Its Analogs in the Motor Domain
Source: MDPI journal article supplement (doi:10.3390/ijms25063394), 2024-03-16
Supplement: s1 [file s1]

# Supplementary Information

## The Impact of C-3 Side Chain Modifications on Kynurenic Acid: A Behavioral Analysis of Its Analogs in the Motor Domain

### Authors

Diána Martos <sup>1</sup>, Bálint Lőrinczi <sup>2</sup>, István Szatmári <sup>2</sup>, László Vecsei <sup>1,3,†,\*</sup> and Masaru Tanaka <sup>1,†,\*</sup>

### Affiliations

<sup>1</sup> HUN-REN-SZTE Neuroscience Research Group, Hungarian Research Network, University of Szeged Danube Neuroscience Research Laboratory, Tisza Lajos krt. 113, H-6725 Szeged, Hungary; martos.diana@med.u-szeged.hu (D.M.); vecsei.laszlo@med.u-szeged.hu (L.V.); tanaka.masaru.1@med.u-szeged.hu (M.T.)

<sup>2</sup> Institute of Pharmaceutical Chemistry and HUN-REN-SZTE Stereochemistry Research Group, University of Szeged, Eötvös u. 6, H-6720 Szeged, Hungary; lorinczi.balint@szte.hu (B.L.); szatmari.istvan@szte.hu (I.S.)

<sup>3</sup> Department of Neurology, Albert Szent-Györgyi Medical School, University of Szeged, Semmelweis u. 6, H-6725 Szeged, Hungary

\* Correspondence: vecsei.laszlo@med.u-szeged.hu (L.V.); tanaka.masaru.1@med.u-szeged.hu (M.T.); Tel.: +36-62-545-351(L.V.); +36-62-342-847 (M.T.)

† These authors contributed equally to this work.

### Contents

1. <sup>1</sup>H NMR and <sup>13</sup>C NMR spectra of synthesized compounds

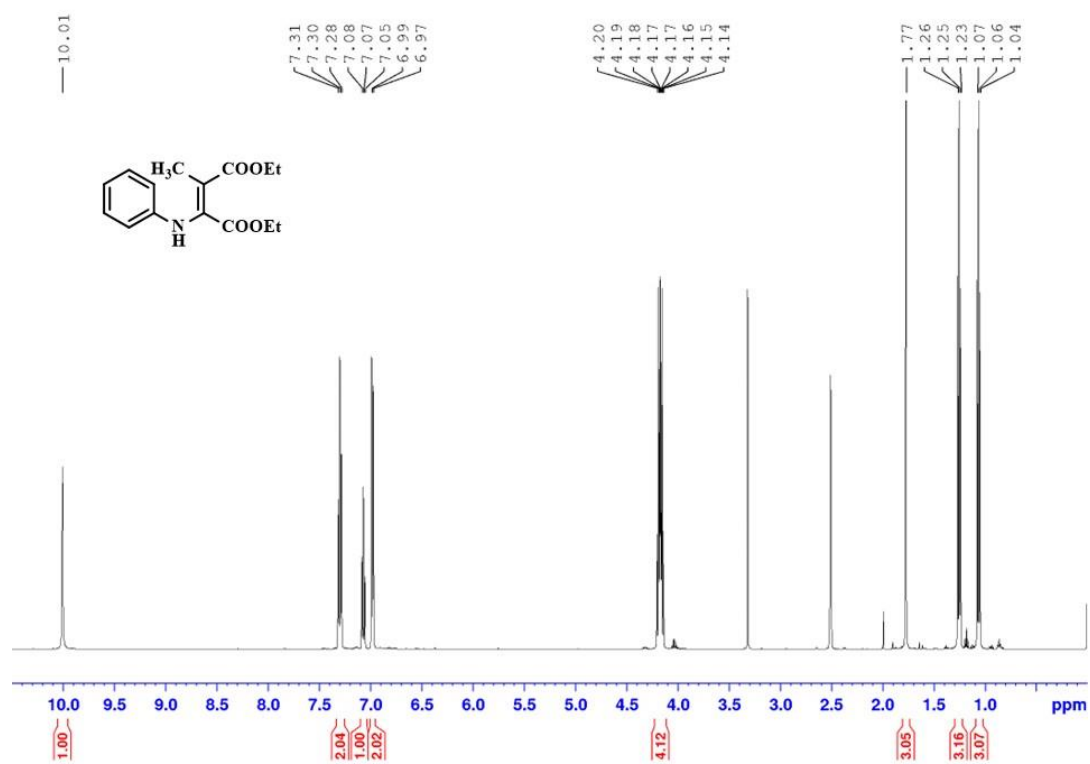

**Figure S1.** <sup>1</sup>H-NMR spectrum of Diethyl 2-methyl-3-(phenylamino)maleate

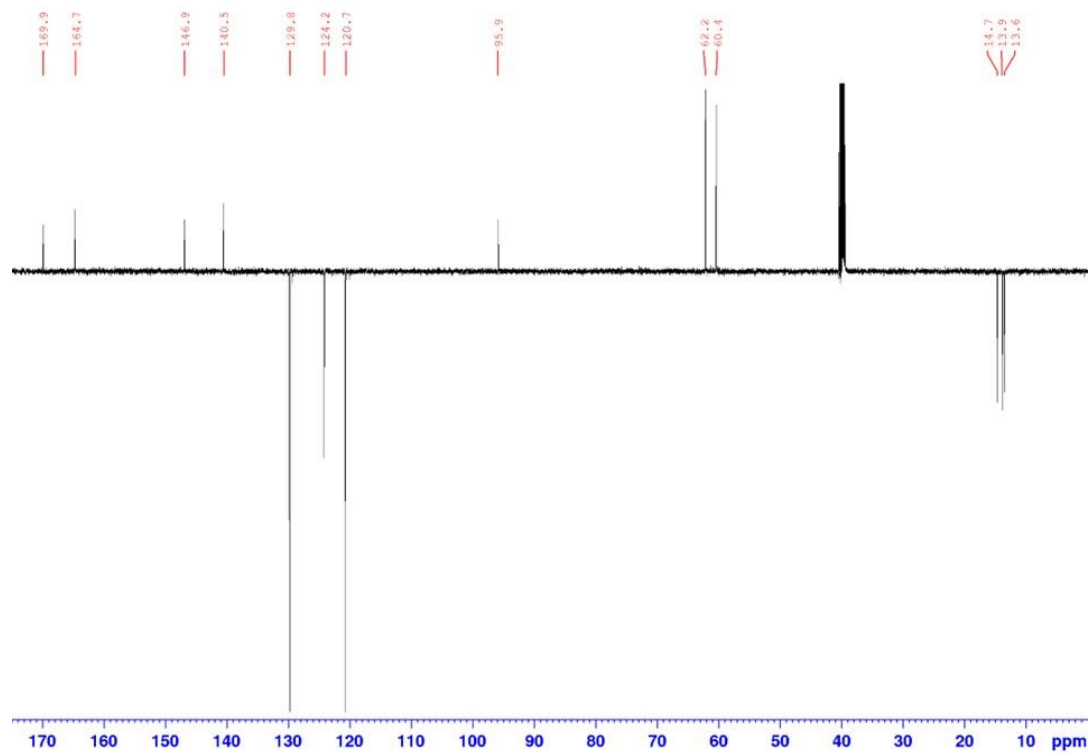

**Figure S2.** <sup>13</sup>C-NMR spectrum of Diethyl 2-methyl-3-(phenylamino)maleate

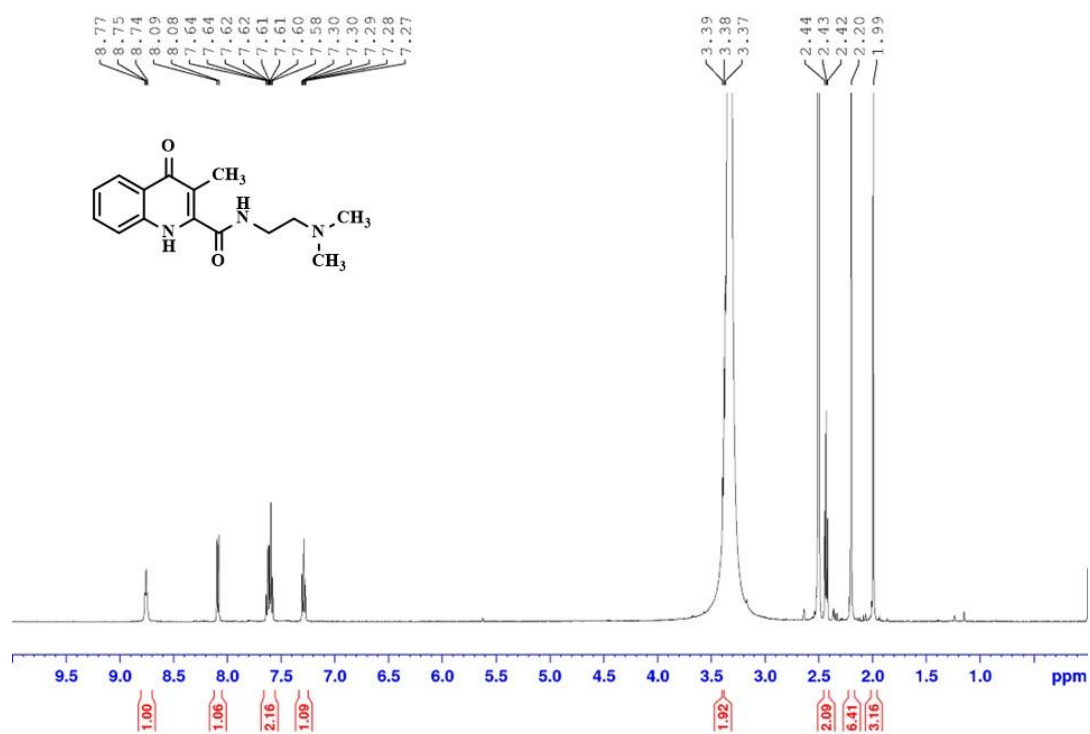

**Figure S3.** <sup>1</sup>H-NMR spectrum of *N*-(2-(dimethylamino)ethyl)-3-methyl-4-oxo-1,4-dihydroquinoline-2-carboxamide

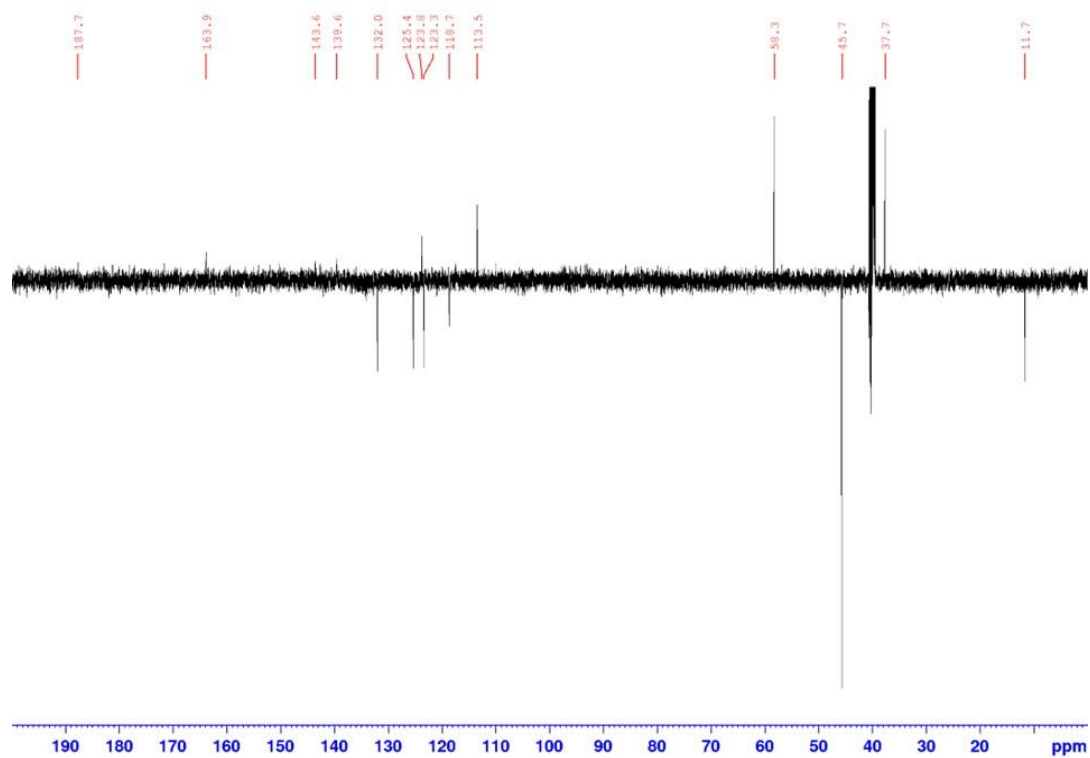

**Figure S4.** <sup>13</sup>C-NMR spectrum of *N*-(2-(dimethylamino)ethyl)-3-methyl-4-oxo-1,4-dihydroquinoline-2-carboxamide

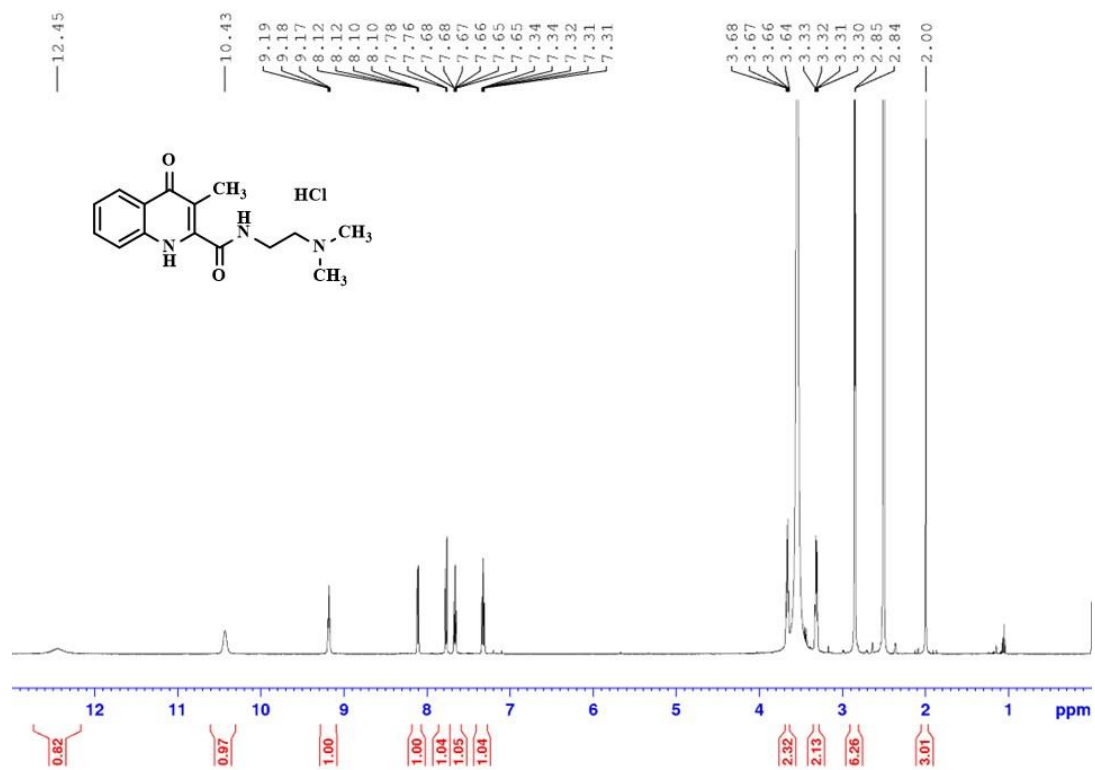

Figure S5. <sup>1</sup>H-NMR spectrum of SZRG-21

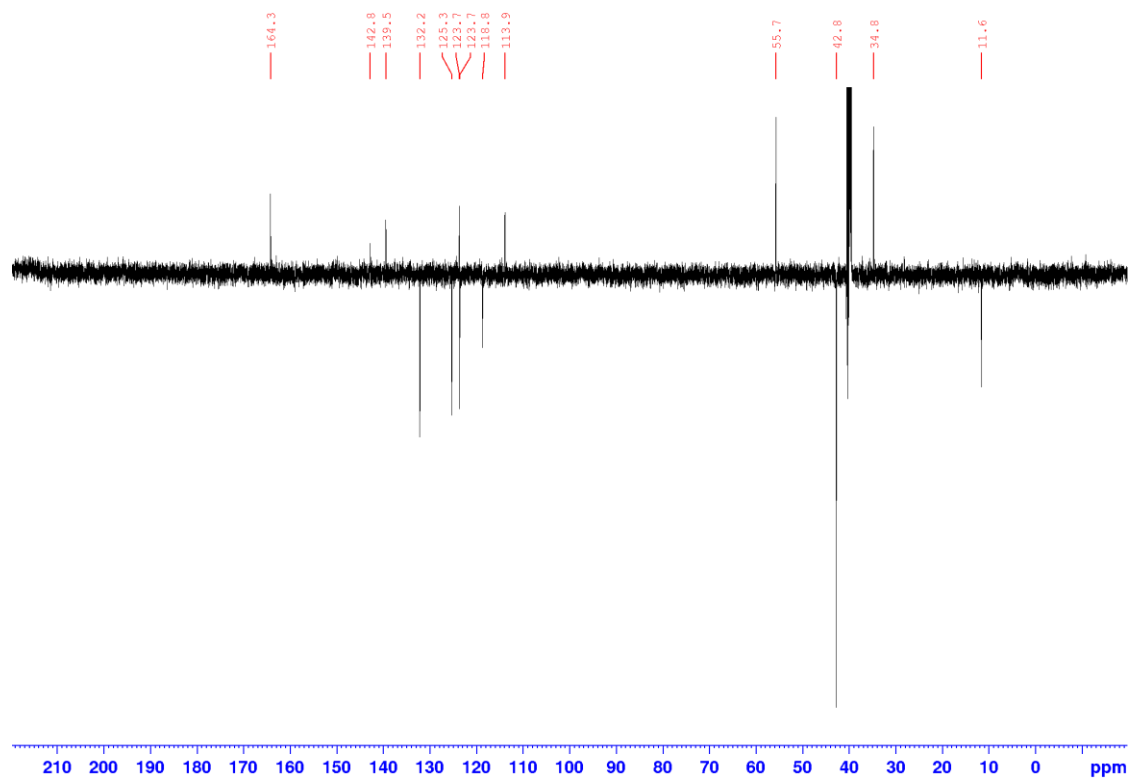

Figure S6. <sup>13</sup>C-NMR spectrum of SZRG-21
